# Supplementary material
Source: PubMed Central journal article supplement (PMC3731564)
Supplement: cr201380x1.pdf [file cr201380x1.pdf]

**Supplementary information, Table S1** Data collection and refinement statistics for ISG58 (SAD)

|                                                     | Native                                        | Se Derivative                                 |
|-----------------------------------------------------|-----------------------------------------------|-----------------------------------------------|
| <b>Data collection</b>                              |                                               |                                               |
| Beam Line                                           | SSRF_BL17U                                    | Diamond_I04                                   |
| Space group                                         | P2 <sub>1</sub> 2 <sub>1</sub> 2 <sub>1</sub> | P2 <sub>1</sub> 2 <sub>1</sub> 2 <sub>1</sub> |
| Cell dimensions                                     |                                               |                                               |
| <i>a</i> , <i>b</i> , <i>c</i> (Å)                  | 63.722,71.529,115.526                         | 63.870,71.530,116.290                         |
| $\alpha$ , $\beta$ , $\gamma$ (°)                   | 90.00, 90.00, 90.00                           | 90.00, 90.00, 90.00                           |
| Resolution (Å)                                      | 50-1.97 (2.00-1.97) *                         | 50-2.05 (2.09-2.05)                           |
| <i>R</i> <sub>sym/ano</sub>                         | 0.080 (0.796)                                 | 0.117 (0.772)                                 |
| <i>I</i> / $\sigma$ <i>I</i>                        | 52.23 (4.78)                                  | 28.50 (2.85)                                  |
| Completeness (%)                                    | 99.9 (100)                                    | 99.9 (100)                                    |
| Redundancy                                          | 14.3 (14.6)                                   | 7.5 (7.3)                                     |
| <b>Refinement</b>                                   |                                               |                                               |
| Resolution (Å)                                      | 36.7-1.97                                     |                                               |
| No. reflections                                     | 36384                                         |                                               |
| <i>R</i> <sub>work</sub> / <i>R</i> <sub>free</sub> | 19.3%/23.7%                                   |                                               |
| No. atoms                                           | 4220                                          |                                               |
| Protein                                             | 3840                                          |                                               |
| Ligand/ion                                          | 0                                             |                                               |
| Water                                               | 380                                           |                                               |
| <i>B</i> -factors                                   |                                               |                                               |
| Protein                                             | 39.1                                          |                                               |
| Ligand/ion                                          | 0                                             |                                               |
| Water                                               | 45.9                                          |                                               |
| R.m.s. deviations                                   |                                               |                                               |
| Bond lengths (Å)                                    | 0.021                                         |                                               |
| Bond angles (°)                                     | 1.038                                         |                                               |

\*Values in parentheses are for the highest-resolution shell.
