# Supplementary material
Source: PubMed Central journal article supplement (PMC3731564)
Supplement: cr201380x2.pdf [file cr201380x2.pdf]

**Supplementary information, Table S2** Nucleotide sequences used in EMSA

| <b>name</b>       | <b>sequence</b>                         |
|-------------------|-----------------------------------------|
| ssRNA_polyA       | 5' AAAAAAAAAAAAAAAAAA 3'                |
| ssRNA_polyU       | 5' UUUUUUUUUUUUUUUU 3'                  |
| ssRNA_polyC       | 5' CCCCCCCCCCCCCCCC 3'                  |
| dsRNA_AU rich     | 5' AGUAUCGAUACU 3'<br>3'UCAUAGCUAUGA 5' |
| dsRNA_GC rich     | 5' GACGCUAGCGUC 3'<br>3'CUGCGAUCGCAG 5' |
| ssDNA_polyA       | 5' AAAAAAAAAAAAAAAAAA 3'                |
| ssDNA_polyT       | 5' TTTTTTTTTTTTTTTT 3'                  |
| ssDNA_polyC       | 5' CCCCCCCCCCCCCCCC 3'                  |
| dsDNA_AT rich     | 5' AGTATCGATACT 3'<br>3'TCATAGCTATGA 5' |
| dsDNA_GC rich     | 5' GACGCTAGCGTC 3'<br>3'CTGCGATCGCAG 5' |
| 16nt_ssRNA        | 5' CACCCUUGUUUCUACU 3'                  |
| Complementary DNA | 3'GTGGGAACAAAGATGA 5'                   |
