# Supplementary material
Source: PubMed Central journal article supplement (PMC3731564)
Supplement: cr201380x3.pdf [file cr201380x3.pdf]

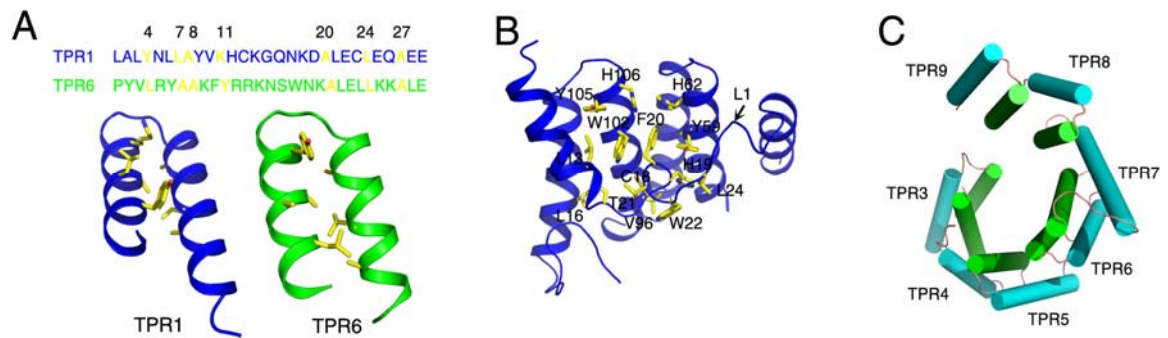

**Supplementary information, Figure S1** Structure detail of ISG58. **(A)** One TPR motif is composed of two anti-parallel helices, helix A and helix B, and seven loosely conserved residues ( $W_4L_7G_8Y_{11}A_{20}F_{24}A_{27}$ ) mediate the interactions between these two helices [1]. Sequences and structures of the TPR1 and TPR6 motifs in ISG58 are shown in blue and green, respectively. Conserved residues at position 4, 7, 8, 11, 20, 24 and 27 are shown as sticks and highlighted in yellow. **(B)** Close-up views of the interactions in the N-terminus of ISG58. Residues involved in the interaction are labeled and shown as sticks. **(C)** The middle-region of ISG58, helices 7-20, generates TPR 3-9 which stacks into a super-helical channel. TPR motifs are labeled. The A helices in the TPR motifs are shown in green and the B helices are shown in cyan.
