# Supplementary material
Source: PubMed Central journal article supplement (PMC3731564)
Supplement: cr201380x5.pdf [file cr201380x5.pdf]

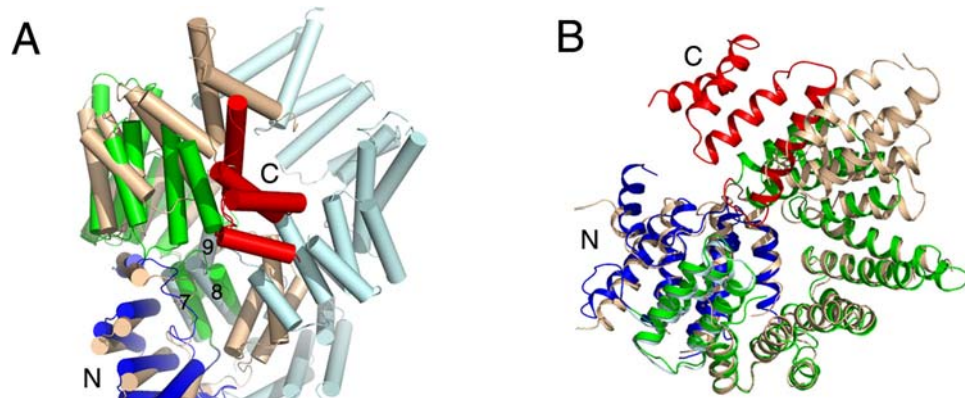

**Supplementary information, Figure S3** Differences between the structures of ISG54 and ISG58. **(A)** Superimposition of ISG58 with the ISG54 dimer. ISG58 is presented as described in Figure 1A. Helices 7-9 are labeled. ISG54 is shown in wheat (monomer A) and pale cyan (monomer B). **(B)** Superimposition of ISG58 with an ISG54 chimera composed of helices 1-6 and 10-22 from monomer A and helices 7-9 from monomer B. When the N-terminal 1-16 helices of ISG54 are superimposed with those of ISG58, the C-terminal conformations of ISG54 (helices 17-22) and ISG58 (helices 17-24) are different.
